# Supplementary material for: CIP2A Promotes T-Cell Activation and Immune Response to Listeria monocytogenes Infection
Source: PubMed Central journal article supplement (PMC4839633; doi:10.1371/journal.pone.0152996), 2016-04-21
Supplement: pone.0152996.s001.pdf [file pone.0152996.s001.pdf]

**A**

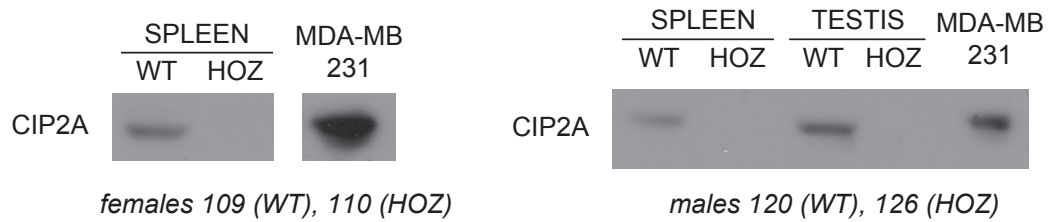

**B**

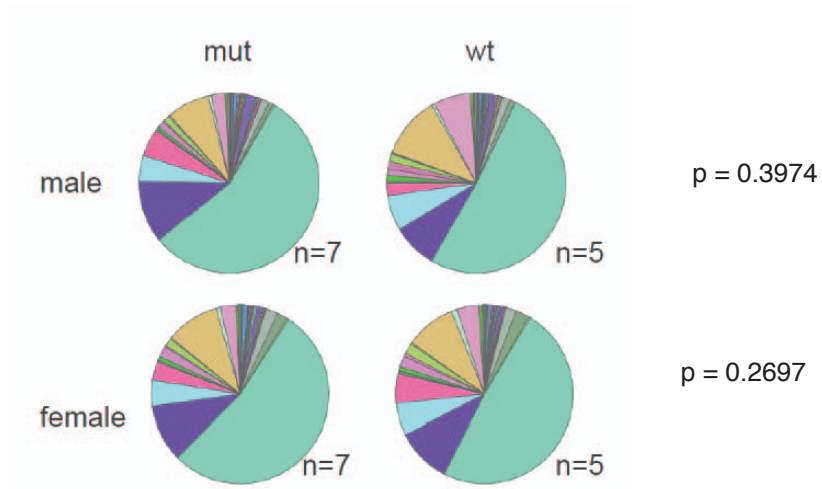

**Figure S1: CIP2A<sup>HOZ</sup> mice present similar B cell subpopulations than WT mice**

(A) Protein expression of spleen and testis from WT and CIP2A<sup>HOZ</sup> adult mice, from littermates. 100 µg of total protein lysate were loaded per well.

(B) Flow cytometric analysis (Boolean gating) of splenocyte B cell subsets using the following markers: CD5, CD11b, B220, MHC-classII (I/E), IgD, CD95.
