# Supplementary material for: CIP2A Promotes T-Cell Activation and Immune Response to Listeria monocytogenes Infection
Source: PubMed Central journal article supplement (PMC4839633; doi:10.1371/journal.pone.0152996), 2016-04-21
Supplement: pone.0152996.s003.pdf [file pone.0152996.s003.pdf]

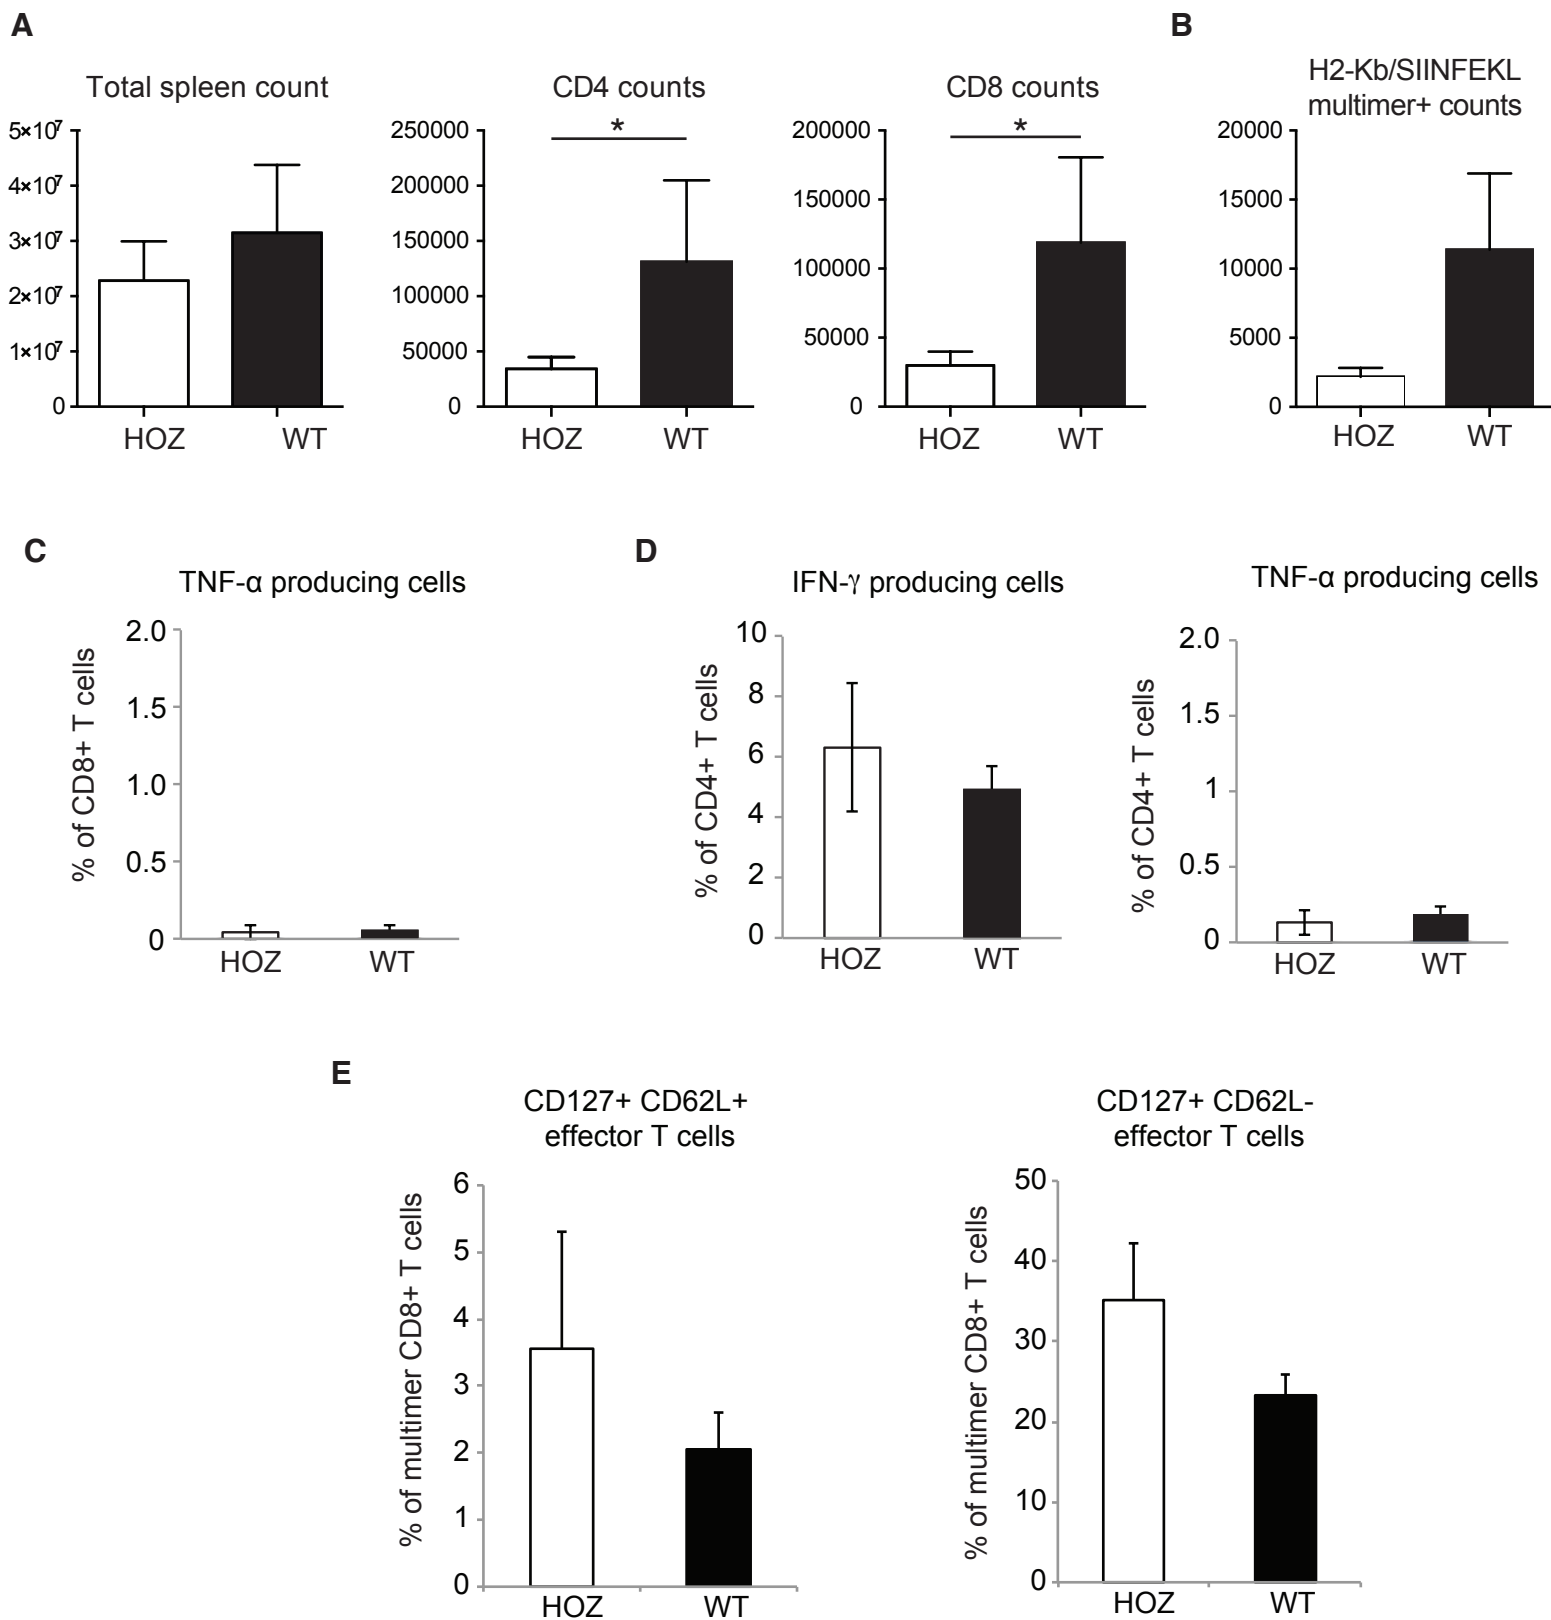

**Figure S3: Analysis of T lymphocytes from WT and CIP2A<sup>HOZ</sup> mice 5 days after recall infection with high-dose L.m.-Ova.**

(A) Total counts of all splenocytes, CD4+ or CD8+ specific ones. \*:  $p = 0.0556$ , Mann-Whitney t-test.

(B) Total counts of H2-Kb/SIINFEKL multimer+ cells of CD8+ T cells.  $p = 0.0571$ , Mann-Whitney test.

(C) TNF-alpha producing cells, gated on CD45+ CD3+ CD8+.

(D) CD45+ CD3+ CD4+ gated cells expressing IFN-gamma (left) or TNF-alpha (right).

(E) Bar chart numbers indicate percentages of various effector T-cell population (CD127+ CD62L<sup>high</sup> and CD127+ CD62L<sup>low</sup>) populations on Ova-specific (H-2Kb/SIINFEKL multimer+) CD8+ T cells.
