# Supplementary material for: CIP2A Promotes T-Cell Activation and Immune Response to Listeria monocytogenes Infection
Source: PubMed Central journal article supplement (PMC4839633; doi:10.1371/journal.pone.0152996), 2016-04-21
Supplement: pone.0152996.s004.pdf [file pone.0152996.s004.pdf]

**A**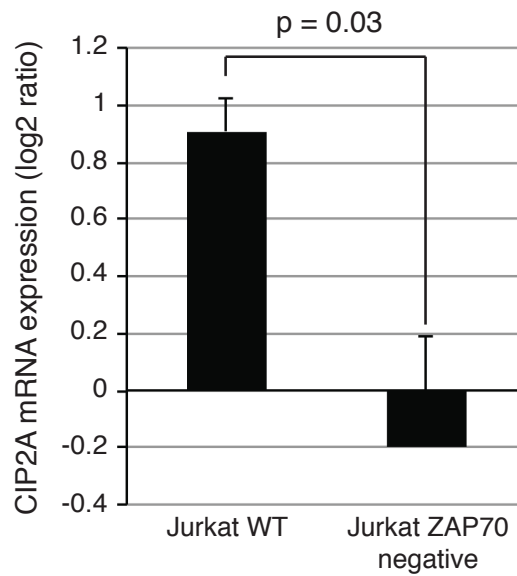**B**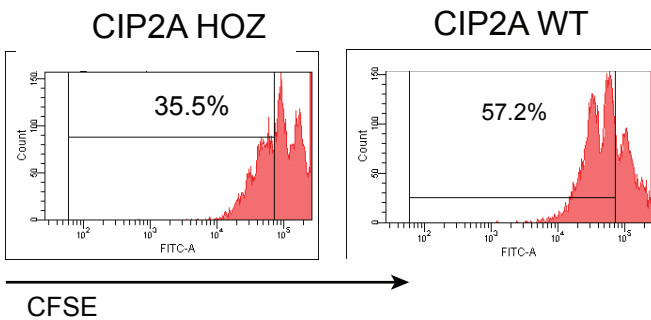**C**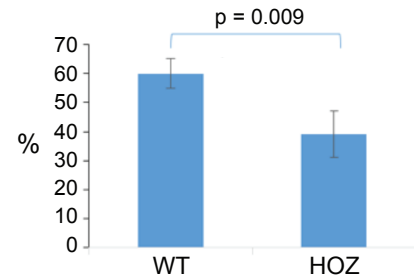**D**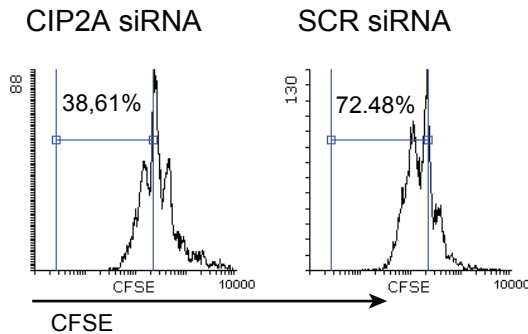**E**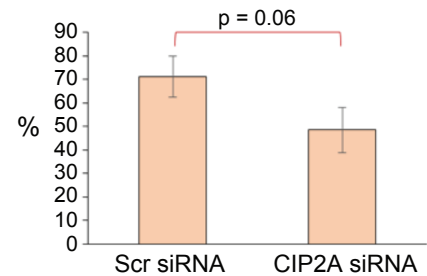

### Figure S4: CIP2A expression is induced during T cell activation and modulates this activation

(A) CIP2A mRNA expression from WT or ZAP70 negative Jurkat T cells.

(B) Representative CFSE dilution by CD4<sup>+</sup>CD62L<sup>+</sup> T cells isolated from WT or CIP2A<sup>HOZ</sup> mice stimulated with anti-CD3 and anti-CD28 after 4 days of culture. (C) Quantification of three biological replicates (paired Student t-test).

(D) Representative CFSE dilution by human CD4<sup>+</sup> T cells isolated from umbilical cord blood (pooled from 5-6 individuals) after nucleofection with scramble nontargeting siRNA or CIP2A siRNA. Cells were rested for 48hrs and activated with anti-CD3 and anti-CD28 after 4 days of culture. (E) Quantification of three biological replicates (paired Student t-test).
