# Supplementary material for: CIP2A Promotes T-Cell Activation and Immune Response to Listeria monocytogenes Infection
Source: PubMed Central journal article supplement (PMC4839633; doi:10.1371/journal.pone.0152996), 2016-04-21
Supplement: pone.0152996.s006.pdf [file pone.0152996.s006.pdf]

**Table S1: Number of animals used per organ for RT-Q-PCR analysis**

| organ       | WT | CIP2A <sup>HOZ</sup> |
|-------------|----|----------------------|
| Bone marrow | 5  | 8                    |
| Lymph Node  | 8  | 5                    |
| Spleen      | 11 | 19                   |
| Thymus      | 3  | 3                    |
| Testis      | 2  | 4                    |
